# 1 Neural circuit robustness to acute, global physiological perturbations

2

3 Jacob Ratliff<sup>1,2</sup>, Eve Marder<sup>1</sup>, Timothy O'Leary<sup>3</sup>

4

5 <sup>1</sup> Biology Department and Volen Center, Brandeis University, Waltham, MA 02454, USA; <sup>2</sup>

6 Present address: Dominick P Purpura Department of Neuroscience, Albert Einstein College

7 of Medicine, Rose F. Kennedy Center, 1410 Pelham Parkway South Room 203, Bronx, NY

8 10461, USA; <sup>3</sup> Department of Engineering, University of Cambridge, UK

9

## 10 Abstract

11 Neural function depends on underlying physiological processes that are highly sensitive to  
12 physical variables such as temperature. However, some robustness to perturbations in  
13 these variables manifests at the circuit level, suggesting that circuit properties are organized  
14 to tolerate consistent changes in underlying parameters. We show that a crustacean  
15 pacemaker circuit is robust to two global perturbations - temperature and pH - that  
16 differentially alter circuit properties. Consistent with high variability in underlying circuit  
17 parameters, we find that the critical temperatures and pH values where circuit activity  
18 breaks down vary widely across animals. Despite variability in critical points the network  
19 state transitions at these critical points are consistent, implying that qualitative circuit  
20 dynamics are preserved across animals, in spite of high quantitative parameter variability.  
21 Surprisingly, robustness perturbations in pH only moderately affect temperature  
22 robustness. Thus, robustness to a global perturbation does not necessarily imply sensitivity  
23 to other global perturbations.

24

## 25 Introduction

26 All nervous systems experience fluctuations in their environment that have the potential to  
27 disrupt circuit activity. In many species, fluctuations in core physical variables such as  
28 temperature and pH are actively buffered by compensatory physiological responses and  
29 behavioral preferences (Haddad & Marder 2018, Marder et al 2015, Obara et al 2008,  
30 Pequeux 1995, Robertson & Money 2012). In addition to active mechanisms that maintain  
31 homeostasis, neural circuits exhibit intrinsic robustness to perturbations that are not

32 compensated by other means, providing an additional line of defense against circuit failure  
33 (Roemschied et al 2014, Soofi et al 2014, Tang et al 2010, Tang et al 2012).

34         Recent work in crustacean nervous systems shows a core neural circuit in the  
35 Stomatogastric Ganglion (STG) of the crab, *Cancer borealis*, can maintain normal activity  
36 patterns despite very large changes in temperature spanning tens of degrees Celsius  
37 (Rinberg et al 2013, Soofi et al 2014, Tang et al 2010, Tang et al 2012). This robustness  
38 makes sense ecologically, because crustaceans such as crabs and lobsters are poikilotherms  
39 - they do not regulate their body temperature precisely - and experience natural variations  
40 in temperature in their habitat. However, all biochemical reactions are temperature-  
41 dependent, so every physiological property that underpins circuit function will be altered by  
42 a temperature change. For this reason, we refer to a temperature perturbation as a global  
43 perturbation.

44         There are several surprising aspects of the STG's robustness to acute changes in  
45 temperature. The underlying physiological properties of the neurons show large and  
46 heterogeneous temperature sensitivities that differ several-fold between different currents  
47 and gating variables (Tang et al 2010). Without constraints on channel expression  
48 relationships, such strong and heterogeneous temperature dependence would detune  
49 physiological properties and cause circuit failure for modest temperature changes (Caplan  
50 et al 2014, O'Leary & Marder 2016, Robertson & Money 2012). However, it is well known  
51 that there is large (several-fold) variability in the expression of the different ionic  
52 conductances within the identified neurons of the STG (Schulz et al 2006, Schulz et al 2007).  
53 Therefore, any mechanism that tunes conductance expression to avoid temperature  
54 induced instability must also allow large variation in the space of solutions it finds. Recent  
55 work has shown how correlations in conductance expression can reconcile variability with  
56 temperature robustness, provided the correlations are constrained to offset the sensitivity  
57 of circuit behavior to channel properties (O'Leary & Marder 2016).

58         Together these observations suggest that robustness to temperature imposes a  
59 constraint on the physiological properties of the circuit. An immediate question is whether  
60 such a constraint might be satisfied only at the cost of making the circuit vulnerable to other  
61 kinds of global perturbations. The question we address here is how temperature robustness  
62 interacts with, or limits robustness to other global perturbations that alter circuit properties  
63 distinctly from temperature.

64 We investigated combined robustness of the pyloric pacemaker circuit in the STG to  
65 both temperature and pH perturbations. We subjected the same recorded neurons to  
66 simultaneous temperature and pH variations during normal ongoing circuit activity. pH has  
67 similar widespread effects on ionic currents, reversal potentials and channel kinetics as  
68 temperature (Church et al 1998, Cook et al 1984, Hille 2001, Tombaugh & Somjen 1996,  
69 Xiong & Stringer 2000), although the effects of pH on individual physiological variables in  
70 the STG are not as well characterized as those of temperature (Golowasch & Deitmer 1993).  
71 Moreover, there is some evidence that crabs and other marine organisms may experience  
72 acute changes in pH in their environment, suggesting that the circuit may be adapted to  
73 cope with this perturbation (Sartoris & Pörtner 1997, Truchot 1973, Whiteley 2011). We  
74 developed a means of quantifying internal variability in the pyloric rhythm that is predictive  
75 of the eventual collapse of the rhythm, albeit to a limited extent.

76

## 77 **Results**

78

79 The pyloric rhythm in the stomatogastric ganglion (STG) is driven by a subset of identified  
80 neurons that comprise a so-called pacemaker kernel consisting of the two (PD, pyloric  
81 dilator) and single AB (anterior burster) neurons. The pacemaker kernel rhythmically  
82 inhibits the LP (lateral pyloric) and PY (pyloric) neurons, as depicted in Figure 1A. The  
83 pacemaker kernel is required for a stable oscillation in the full circuit. The AB neuron is an  
84 intrinsically bursting cell that is strongly electrically coupled to the two PD neurons. The LP  
85 neuron feeds back onto and inhibits the PD neurons using glutamatergic transmission and  
86 can be seen in the intracellular waveform of the PD neuron as inhibitory post synaptic  
87 potentials (IPSPs) (Figure 1A, bottom). We focused on the pacemaker kernel, which is able  
88 to maintain a stable oscillation when isolated pharmacologically from the rest of the circuit.  
89 By adding picrotoxin (PTX), we blocked the glutamatergic transmission in the STG thereby  
90 removing the feedback connections on the pacemaking kernel (Figure 1B) (Marder & Eisen  
91 1984). After the addition of PTX, glutamatergic IPSPs are no longer present and the  
92 membrane potential depolarizes slightly, but the activity recorded either of the PD neurons  
93 shows a stable oscillation (Figure 1B, bottom panel).

94

## 95 **Activity of isolated pacemaker near critical temperatures**

96

97 We examined the activity of the pacemaker kernel in response to acute changes in  
98 temperature. Previous work established that the pacemaker oscillation fails at a critical  
99 temperature (Rinberg et al 2013). We roughly determined the temperature at which the  
100 intact pyloric rhythm became disorganized or silent using extracellular recordings. We  
101 denote this the *critical temperature* or *transition point*. Consistent with previous work,  
102 many preparations are robust for large changes in temperature that would prohibit a stable  
103 intracellular recording. We therefore selected preparations (13 in this set of experiments)  
104 that showed a reversible temperature-induced transition in the range 11-30°C. We then set  
105 the temperature of the bath solution to 5°C below the transition point, applied picrotoxin,  
106 and obtained intracellular recordings from a PD neuron in the isolated pacemaker. The  
107 temperature was then slowly increased at a rate of approximately 5°C per hour while  
108 holding the intracellular recording allowing us to monitor changes in the activity patterns of  
109 the isolated pacemaker with small changes in temperature (Figure 2).

110 Recordings from three example experiments are shown in Figures 2A-C. When far  
111 from critical temperatures, the isolated pacemaker had relatively constant burst frequency  
112 with clear membrane potential plateaus and bursts of action potentials. As temperature was  
113 increased, bursting became less regular, leaving plateaus with few or no spikes and variable  
114 interburst intervals. Qualitative changes in bursting of the pacemaker, i.e. transition points,  
115 were observed across small changes in temperature and between preparations these  
116 qualitative changes occur at different temperatures. In Figure 2A for example, there is a  
117 change in activity patterns of the preparation between 29.2°C to 30°C with bursting activity  
118 ceasing at the higher temperature. In this preparation, there is with little qualitative change  
119 between 26.6°C and 28.6°C, which can be contrasted with the changes in the preparation  
120 shown in Figure 2B where there is a dramatic change in activity pattern of the pacemaker  
121 from 26.3°C to 26.8°C. In each preparation as temperature was increased further, activity  
122 patterns transitioned to silence, with no spikes fired and only small fluctuations in the  
123 membrane potential (Figure 2A-C, bottom traces).

124 To quantitatively examine the changes in activity of the isolated pacemaker near  
125 critical temperatures, we measured the burst frequency, duty cycle, and minimum  
126 membrane potential plotted against absolute temperature (Figure 2D-F) and relative to the  
127 transition point to silence (Figure 2G, H). Duty cycle is defined as the duration of time

128 spiking normalized to the burst period and has previously been shown to be conserved over  
129 temperature ranges that permit a stable oscillation (Rinberg et al 2013, Tang et al 2010).

130 It has previously been shown that the burst frequency of the isolated pacemaker  
131 increases with temperature between 10°C and 25°C (Rinberg et al 2013, Tang et al 2010).  
132 When examining burst frequency near critical temperatures, we found that this relationship  
133 was not present (Figure 2D) as there was no consistent increase in frequency with increasing  
134 temperature across preparations. In addition, when data were aligned to transition to  
135 silence, mean frequency across preparations decreases as preparations approach the  
136 transition, with increasing between-preparation variability (Figure 2G). Furthermore, duty  
137 cycle becomes more variable between preparations near critical temperatures (Figure 2E),  
138 and when aligned to the transitions to silence, we saw that there is greatly increased  
139 variability between preparations near critical transitions.

140

#### 141 **Activity of isolated pacemaker near critical pH**

142

143 To contrast temperature-induced changes with those induced by a second global  
144 perturbation, we examined the effects of acidic pH on the isolated pacemaker. Recent work  
145 has shown that the pyloric rhythm continues in the presence of extreme pH in an  
146 approximate range from pH 6.1 to pH 8.8 and that below approximately pH 6, the pyloric  
147 rhythm becomes silent (Haley et al 2018). We sought to examine what occurs near these  
148 critical pH levels. To do this, we obtained intracellular recordings of the PD neuron in  
149 physiological saline at 11°C (~pH 7.8). pH was then slowly lowered by continuously adding  
150 pH 5 saline to the volume of saline feeding the bath with the rate of mixing adjusted to  
151 create a change to pH 6 over the course of one hour.

152 Example traces from three experiments are shown in Figures 3A-C. All preparations  
153 were bursting at pH 7 (Figure 3A-C, top traces), but as pH was decreased, the regularity of  
154 this bursting changed with preparations depolarizing and the amplitude of the slow wave  
155 decreasing (Figure 3A-C). At lower pH, bursting became intermittent with periods of tonic  
156 spiking and eventually the isolated pacemaker transitioned to tonic spiking activity (Figure  
157 3A-C, middle). After this transition, further decreases in pH caused additional  
158 depolarization, smaller amplitude spikes, and finally the tonic spiking pattern transitioned to  
159 silence (Figure 3A-C). We therefore defined two critical pH values for each of these

160 qualitative transitions in activity, one marking the transition from bursting to tonic spiking  
161 and one marking tonic spiking to silence.

162 To compare the effects of pH and temperature near critical points (Figure 2D-H), we  
163 examined the relationship of pH with burst frequency, duty cycle, and minimum voltage  
164 during oscillations (burst frequency and duty cycle are only defined during bursting). In the  
165 range examined here, there is little effect of pH on burst frequency with a modest trend  
166 toward increased burst frequency (Figure 3D, G). Duty cycle near critical pH is variable, with  
167 many, but not all, preparations having increased duty cycle prior to transition to tonic  
168 spiking (Figure 3E, H). In contrast preparations near critical temperatures (Figure 2F),  
169 changes in pH cause substantial depolarization (Figure 3F). The qualitative and quantitative  
170 differences between pH- and temperature-induced changes in membrane potential activity  
171 are consistent with these perturbations having distinct, global effects on underlying  
172 membrane currents, as shown in previous work (Church et al 1998, Doering & McRory 2007,  
173 Golowasch & Deitmer 1993, Tombaugh & Somjen 1996).

174

#### 175 **Predicting transitions in isolated pacemaker**

176

177 We have shown that near critical temperatures and pH the activity patterns of the isolated  
178 pacemaker change abruptly with critical points varying between preparations. These  
179 transitions occur at different temperatures and pH in different preparations. There is a body  
180 of theory (Chisholm & Filotas 2009, Kandel et al 1988, Scheffer 2010, Scheffer et al 2012,  
181 Veraart et al 2012) that proposes a set of generalized markers to predict critical transitions  
182 in dynamical systems, including complex biological systems. These markers include  
183 increased variability, increased recovery time from perturbation, and flickering between  
184 states. We therefore analyzed membrane potential variability near transitions to assess the  
185 power to predict the precise transition points in the activity patterns of the isolated  
186 pacemaker.

187 Increased variability is depicted in Figure 4A and B using an example system  
188 consisting of a ball in a trough, subject to noisy perturbations. This system is stably attracted  
189 to state 0, the lowest energy state, while noise moves the balls randomly away from this  
190 stable point. As the system moves closer to reorganizing, thereby gaining a new stable state,  
191 the basin of attraction shallows (Figure 4B). The same amount of noise now generates

192 greater variation in the movement of the ball. This simple example illustrates why increased  
193 variability is expected near a transition point in a dynamical system: ongoing, internal noise  
194 perturbations cause variability in the system's dynamics. As the system approaches a  
195 transition, its sensitivity generically increases, and the impact of the internal noise becomes  
196 more visible.

197 We examined within-preparation variance as a predictor of transitions by examining  
198 the membrane potential traces in their phase plane, as shown in Figure 4C. This allowed us  
199 to define the 'mean oscillation,' by computing the mean trajectory across multiple  
200 oscillations, and a coefficient of variation (CV, standard deviation normalized to the mean).  
201 This provides a measure of the internal variability of the oscillation from its average  
202 trajectory. We then combined these CV values (see methods) to compute an overall  
203 measure of variability (Combined Coefficient of Variation, CCV) and plotted this as a  
204 function of distance to a transition in both temperature and pH-induced transitions. These  
205 CCV values are shown in Figure 4 (D-F), aligned to respective transition points (dashed red  
206 line).

207 We analyzed variability in all preparations near temperature and pH-induced  
208 transitions. Consistent with theoretical predictions, there was a general trend for the CCV to  
209 increase near a transition. Importantly this increase occurs irrespective of the type of  
210 transition or the perturbation (temperature or pH) that led to it. However, this measure  
211 offers a poor prediction of proximity to a transition within any given preparation. For  
212 example, with the temperature perturbation, a CCV value of 6 could mean the preparation  
213 is at the transition point or more than 3 degrees away. In the case of transition to silence  
214 due to pH perturbation, the variance in many of the preparations decreases near the  
215 transition to silence. Thus, while variability at the population level shows a robust increase  
216 near transition points, there is large inter-preparation variability in this relationship that  
217 would preclude its use as a predictive tool for the onset of a transition in any given  
218 preparation.

219

## 220 **Combined effects of temperature and pH**

221

222 Lastly, we sought to understand the relationship between pH perturbations and  
223 temperature perturbations. We started by performing pH perturbations at 25°C, obtaining

224 intracellular recordings of the PD neuron in the isolated pacemaker, a temperature at which  
225 all preparations are bursting (Figure 5A). We then subjected these same preparations to  
226 decreasing pH ramps. The transition points are highly variable across preparations; as a  
227 consequence, pH ramps performed at 11°C and 25°C show transitions in overlapping ranges  
228 (Figure 5A, C).

229 To control for inter-preparation variability when testing the interaction of pH and  
230 temperature, we exposed preparations to multiple perturbations: decreasing pH at 11°C,  
231 decreasing pH at 25°C, and increasing temperature in a set of seven preparations (Figure  
232 5B). This allowed us to test two hypotheses: that the combination of temperature and pH  
233 will make preparations more sensitive (transition at less extreme values) or that  
234 preparations may be ‘tuned’ for robustness to one perturbation over another (preparations  
235 more sensitive to pH will be less sensitive to temperature and vice versa). Surprisingly,  
236 neither of these possibilities holds true in the data. At more extreme temperatures,  
237 preparations transitioned to tonic spiking at more extreme pH at 25°C compared to their  
238 transition points at 11°C. Together, these results show that there is a modest interaction  
239 between temperature and pH perturbations which, surprisingly confers slightly higher pH  
240 robustness at more extreme temperatures.

241

### 242 **Stereotyped transitions during temperature and pH perturbations**

243

244 We have shown that the pacemaker oscillation undergoes different types of transitions in  
245 activity patterns when exposed to temperature and pH respectively. In Figure 5C, we  
246 plotted the activity patterns as a function of temperature or pH, respectively for the set of  
247 experiments from Figures 2 and 3. In each of the temperature experiments combined with  
248 those from Figure 5B, all 26 preparations transitioned from bursting to silence without tonic  
249 spiking. In contrast, 25 of 26 pH experiments transitioned from bursting to tonic spiking to  
250 silence while the remaining one transitioned from bursting to silence.

251

### 252 **Discussion**

253

254 As a central pattern generator, the STG is well known for its reliable and stereotyped  
255 behavior. Numerous studies have shown that the STG is robust to physiological insults and



256 pharmacological manipulation. Such robustness is essential, given the importance of the  
257 circuit's function for the animal's survival. Paradoxically, the reliable and stereotyped output  
258 of the STG belies the complexity and variability of the physiological mechanisms that  
259 ultimately govern circuit behavior. Ion channel densities are highly variable, with each  
260 preparation having its own unique configuration that somehow gives rise to a reliable and  
261 robust rhythm (Goaillard et al 2009, Grashow et al 2010, Haddad & Marder 2018, O'Leary et  
262 al 2013, O'Leary et al 2014, Robertson & Money 2012, Schulz et al 2006, Schulz et al 2007,  
263 Taylor et al 2009, Temporal et al 2014).

264 We have shown that a key subcircuit in the STG - the pyloric pacemaker kernel - is  
265 simultaneously robust to two different global perturbations. Temperature and pH were  
266 acutely covaried over a large range without disrupting the pacemaker rhythm. This suggests  
267 that in spite of animal to animal variability, the circuit has found parameters that allow  
268 detuning of ionic currents and synaptic properties to occur, but nonetheless ensure a stable  
269 rhythmic output. Computational studies show that this is a far from trivial result (Caplan et  
270 al 2014, Roemschied et al 2014). The region of functional parameter space occupied by a  
271 circuit is relatively small. Moreover, for the circuit to remain robust to temperature and pH  
272 perturbations that cause parameters to change significantly it is clear that the biological  
273 mechanisms which tune circuit properties do so in a way that ensure specific functional  
274 organization between physiological parameters amid a large degree of variability (O'Leary &  
275 Marder 2016).

276 We found that the pyloric pacemaker circuit is remarkably robust to acute pH  
277 variations. This robustness is somewhat dependent on temperature, indicating that both  
278 kinds of robustness impose constraints on channel expression. However, the interaction  
279 between robustness to temperature and pH robustness was surprisingly small. This implies  
280 that the circuit occupies a region of physiological parameter space that allows temperature  
281 and pH robustness be satisfied without a severe tradeoff, as well as allowing large internal  
282 variability in ionic current expression.

283 Consistent with underlying parameter variability, we find that pH and temperature  
284 cause the pacemaker oscillation to fail at critical values of temperature and pH that vary  
285 significantly between animals. Importantly, the modes of failure correspond to reversible  
286 transitions to distinct activity regimes, from bursting to tonic spiking and then silence in the  
287 case of a pH ramp, and from bursting to silence in the case of a temperature ramp. In

288 agreement with general theory of critical transitions in dynamical systems we detect an  
289 increase in intrinsic variability of the oscillator close to the critical point at which the  
290 oscillation fails (Chisholm & Filotas 2009, Scheffer 2010, Scheffer et al 2012, Veraart et al  
291 2012). The consistency of these qualitative transitions between preparations is strong  
292 evidence that the pyloric circuit operates with a consistent type of oscillatory dynamics.  
293 Together, these findings show that while large variability is indeed present in the  
294 physiological properties of the STG, the mechanisms that organize physiological parameters  
295 place the circuit in a highly robust regime with consistent qualitative behavior. This suggests  
296 that the circuit doesn't merely achieve a robust oscillation, it achieves the same qualitative  
297 type of oscillation in spite of large variability in underlying physiological variables.

298         In spite of the surprising robustness we have characterized in this circuit, there is  
299 clear evidence of underlying parameter variability. Although most preparations undergo the  
300 same transitions between different activity patterns as pH and temperature are varied, the  
301 precise values at which these transitions occur is variable. On the other hand, the transitions  
302 between different activity patterns were remarkably reliable: temperature elevation  
303 consistently resulted in a transition from bursting to silence, while in most preparations a  
304 decrease in pH resulted in a sequence of transitions from bursting to tonic spiking, then  
305 from tonic spiking to silence. Together, these findings illustrate that collective circuit  
306 properties can be highly consistent, even if quantitative, low-level parameters are not. A  
307 plausible explanation for how such consistency arises is that cellular components such as ion  
308 channels are regulated in a collective, modular fashion, with multiple channel types co-  
309 regulated by the same molecular pathway (O'Leary & Marder 2016, O'Leary et al 2014,  
310 Temporal et al 2014).

311         We can view the pacemaker kernel preparation as a vastly simplified biological  
312 model of a nervous system that is subject to particular failure modes. Other more complex  
313 nervous systems such as the brains of vertebrate species exhibit many more components  
314 and kinds of behavior, but they also show stereotyped failure modes such as seizures. Our  
315 findings illustrate just how difficult it is to predict the onset of failure, even with what might  
316 be considered ideal biological replicates of the same system. We found that at the  
317 population level, increases in rhythm variance were indicative of the proximity to a  
318 transition out of the rhythm. This is consistent with recent theory (Chisholm & Filotas 2009,  
319 Scheffer 2010, Scheffer et al 2012) and experimental attempts to predict catastrophic

320 events in complex natural systems (Veraart et al 2012). However, in our data the trend in  
321 variance is far from predictive at the individual level.

322 Our main motivation for studying combined global perturbations to a neural circuit  
323 was to assess whether robustness to one kind of perturbation implied sensitivity to other  
324 kinds of perturbations. For pH and temperature perturbations in the STG, we find a  
325 surprisingly modest interaction in the robustness of the pacemaker rhythm. This suggests  
326 that the circuit may have evolved to exhibit tolerance to both (and likely other) external  
327 insults. This combined tolerance places additional constraints on the expression and  
328 regulation of the underlying membrane currents and synaptic connections (O'Leary &  
329 Marder 2016), and may even favor specific kinds of circuit architectures over others.

330

## 331 **Methods**

### 332 **Animals**

333 *Cancer borealis* were purchased from Commercial Lobster (Boston, MA) and  
334 maintained at 11°C in tanks containing artificial seawater. Animals used in this study were  
335 obtained between July 2016 and November 2017.

### 336 **Solutions**

337 *C. borealis* physiological saline was composed of 440mM NaCl, 26mM MgCl<sub>2</sub>, 13mM  
338 CaCl<sub>2</sub>, 11mM KCl, 12mM Trizma Base, and 5mM maleic acid, pH 7.4-7.5 (measured at room  
339 temperature). For more acidic saline, pH was adjusted with additional maleic acid.  
340 Picrotoxin (PTX) was purchased from Sigma (St Louis, MO) and used at 10<sup>-5</sup> M in  
341 physiological saline. The microelectrode solution was 10mM MgCl<sub>2</sub>, 400mM KGluconate,  
342 10mM HEPES, 15mM NaSO<sub>4</sub>, 20mM NaCl, pH 7.45. (Hooper et al 2015)

### 343 **Electrophysiology**

344 The stomatogastric nervous system was dissected from the animal and pinned  
345 taut in a Sylgard (Dow Corning, Midland, MI) coated plastic Petri dish containing chilled  
346 physiological saline. All preparations used had intact inferior and superior esophageal  
347 nerves and included commissural and esophageal ganglia. For the duration of experiments,  
348 the dish was superfused with saline. Temperature was controlled using a Peltier device  
349 (Warner Instruments) and monitored using a thermistor probe placed in the dish.

350 Vaseline wells were placed around the lateral ventricular nerve (*lvn*) and the pyloric  
351 dilator nerve (*pdn*) and extracellular recordings were obtained using stainless steel pin

352 electrodes placed in the wells and amplified using a differential amplifier (A-M Systems,  
353 Sequim, WA). In addition, intracellular recordings were obtained from the pyloric dilator  
354 (PD) somata using 15-25 M $\Omega$  glass microelectrodes pulled with a Flaming/Brown  
355 micropipette puller (Sutter Instrument Company, Novato, CA). The cell type was identified  
356 by comparing spiking activity to extracellular recordings on the *pdn* and by examining the  
357 intracellular waveform.

358

### 359 *Temperature Manipulations*

360 Intracellular recordings were begun at either 25°C or 7 degrees below a ‘crash’  
361 temperature determined with extracellular recordings. Preparations were then exposed to  
362 continuously increasing temperatures, referred to as temperature ramps. A waveform  
363 generator (Rigol, Beijing, China) was used to create a steadily increasing voltage to control  
364 the output of the Peltier device. Temperature was increased until preparations changed  
365 from bursting to silence without continuous bursting/spiking activity at which point the  
366 temperature ramp was stopped in a majority of experiments.

367 As previously reported, somata swelled with increasing temperature (Rinberg et al  
368 2013, Tang et al 2012). With increasing temperature, small adjustments to the location of  
369 the intracellular electrode were made to maintain the recording.

370 All preparations analyzed, with the exception of the experiments shown in Figure 5B,  
371 were selected based on the presence of the transition to silence. Preparations that  
372 continued to burst past 34°C were excluded.

373

### 374 *pH Manipulations*

375 Intracellular recordings of the PD neuron were begun at physiological pH. After the  
376 addition of PTX, the pH of the superfused saline was controlled by a slow, continuous mixing  
377 of pH 7 and pH 5 physiological saline during the experiments. The pH of the superfused  
378 saline was measured using a pH microelectrode purchased through Thermo Scientific (Orion  
379 9810BN; Waltham, MA). The probe was calibrated each day using reference solutions at  
380 11°C and/or 25°C.

381

### 382 **Data Analysis**

383 Data were acquired using a Digidata 1440 data acquisition board (Axon Instruments,  
384 San Jose, California) and analyzed using MATLAB (MathWorks, Natick, MA).

385

### 386 *Transition Definitions*

387 Discrete transition points were defined in both the pH and temperature experiments  
388 with similar definitions used in both. A transition was marked when a preparation spent  
389 more than 20 seconds out of 30 second period in any activity pattern. This reliably captured  
390 switches from one activity pattern to another while filtering out small flickering events  
391 between activity patterns that occur in small ranges ( $<0.5^{\circ}\text{C}$  or  $<0.2$  pH) near transitions.

392

### 393 *Phase plane analysis*

394 The stretches of data to be analyzed were first low-pass filtered to remove spikes.  
395 The filtered voltage signal and its derivative were normalized by the standard deviation of  
396 each respective signal. The signal was mean subtracted to center the oscillation on the  
397 origin of the axes and then transformed from a Cartesian coordinate system (with the  
398 normalized voltage signal on the x-axis and the normalized voltage derivative on the y-axis)  
399 to polar coordinates. These steps generate the phase portrait shown in Figure 4A.

400 Next, we calculated the average trajectory of the oscillations by taking the mean and  
401 standard deviation of the radial coordinate at 200 evenly spaced angular coordinates. This  
402 gave use the envelope plotted in the phase plane in Figure 4A. From these values, we  
403 calculated the coefficient of variation, the standard deviation normalized to the mean, at  
404 each point in the phase of the oscillation. We then combined the values by taking their root-  
405 mean-square and these values were plotted in Figure 4B-D after being smoothed by taking a  
406  $0.5^{\circ}\text{C}$  or  $0.1$  pH moving average.

407

### 408 **Acknowledgements**

409 We would like to acknowledge Anatoly Rinberg for his contribution to this work in  
410 performing experiments that were preliminary to the study here. We would also like to  
411 thank Jessica Haley for sharing experimental results allowing for the design of these  
412 experiments. This work is funded by NIH grant R35 NS 097343-03 to E.M.

413

### 414 **Competing Interests Statement**

415            The authors have no competing interests to disclose.

416 Figure 1

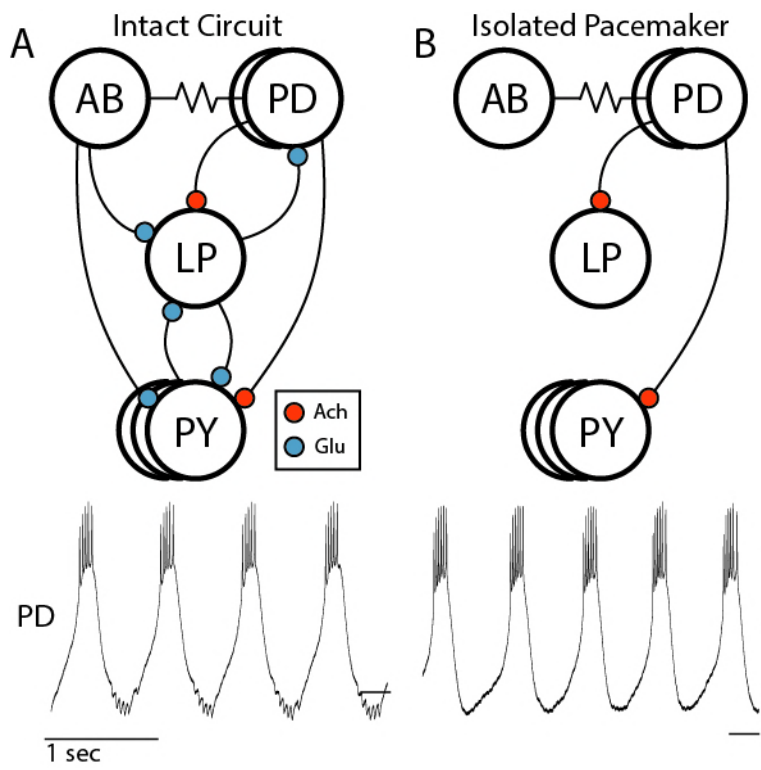

417

418

419 Figure 2

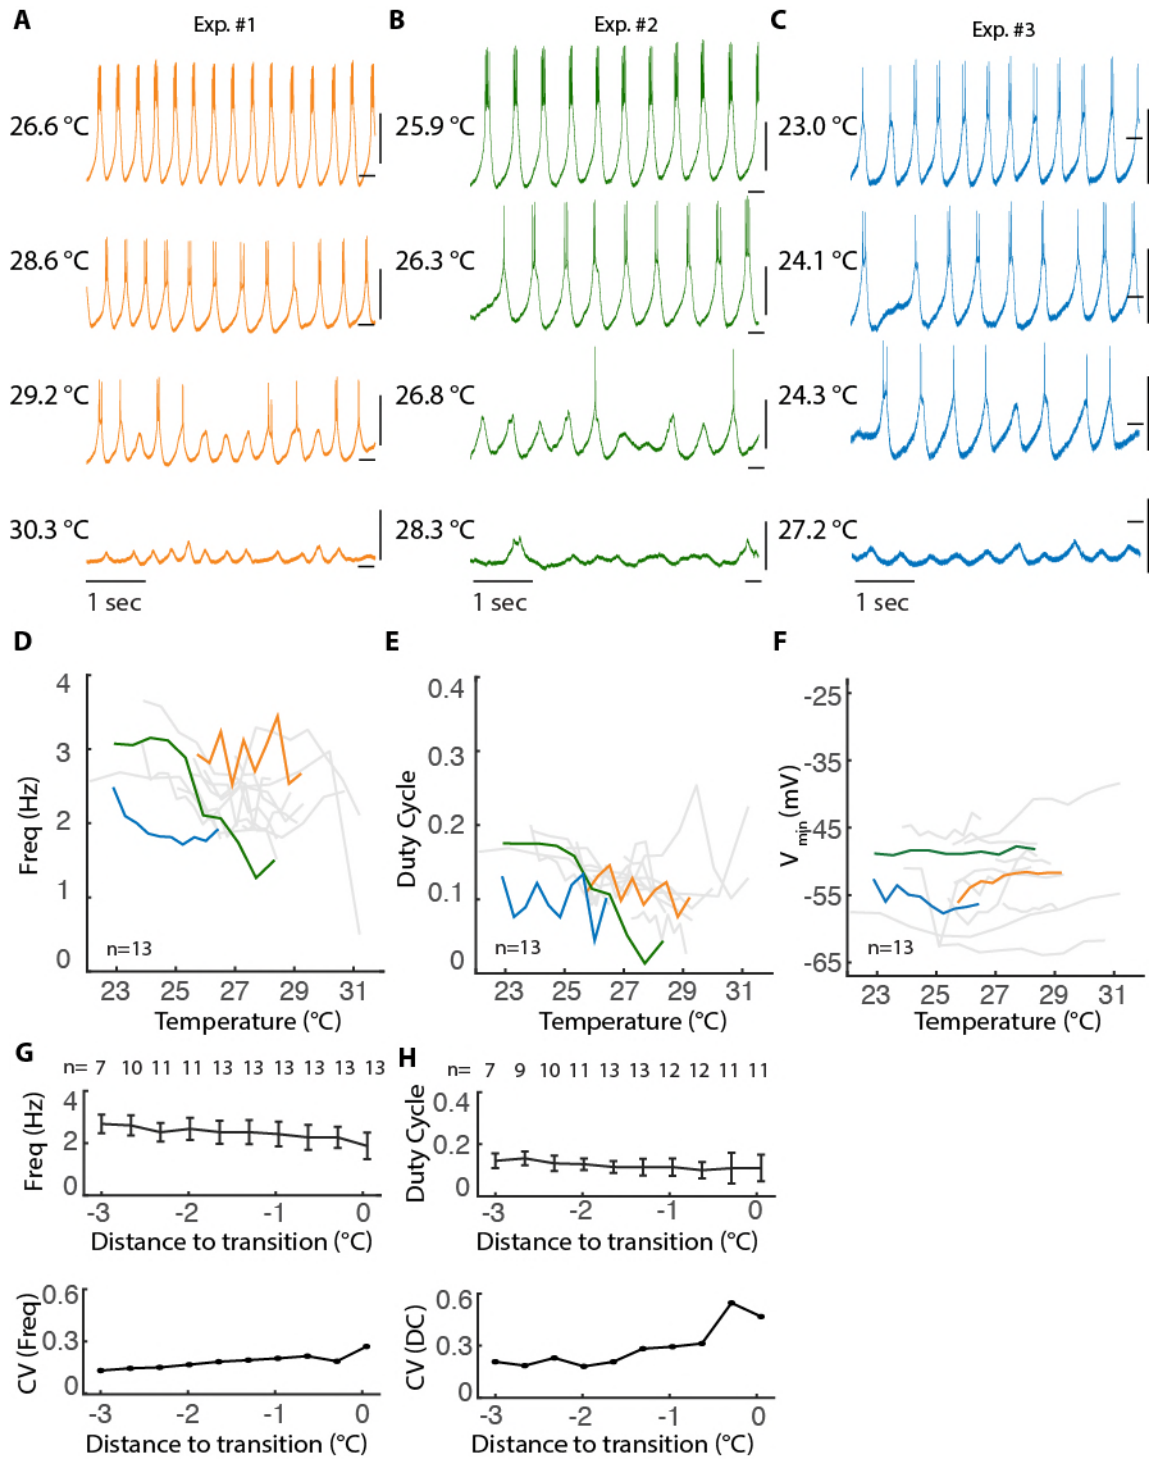

420

421



422 Figure 3

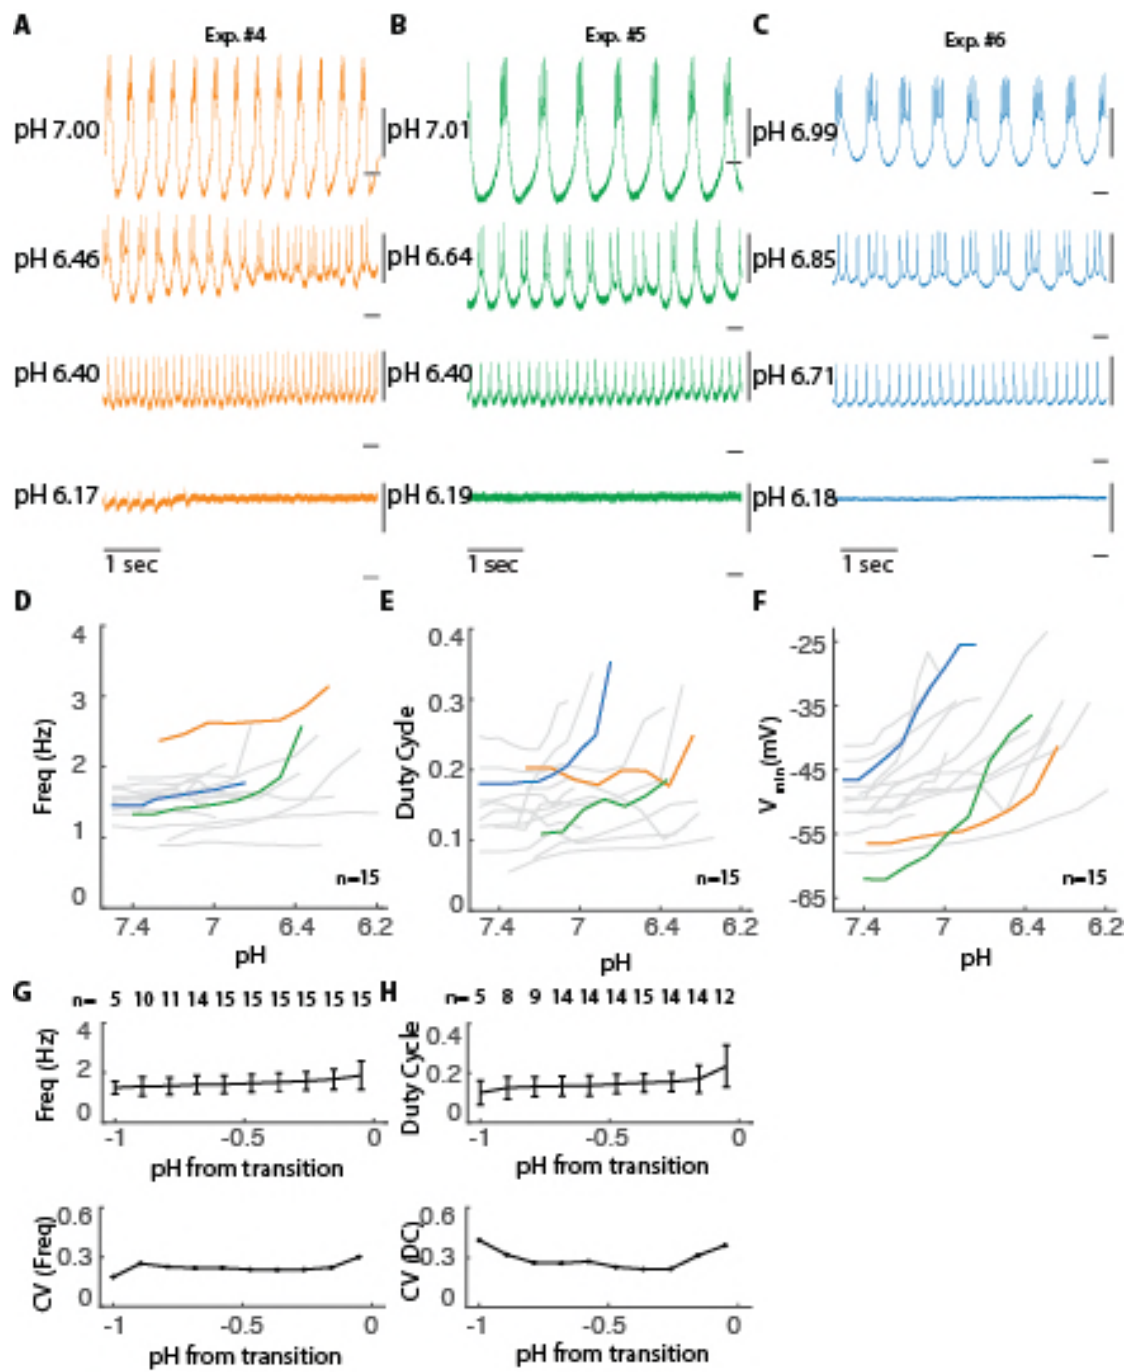

423  
424

425 Figure 4

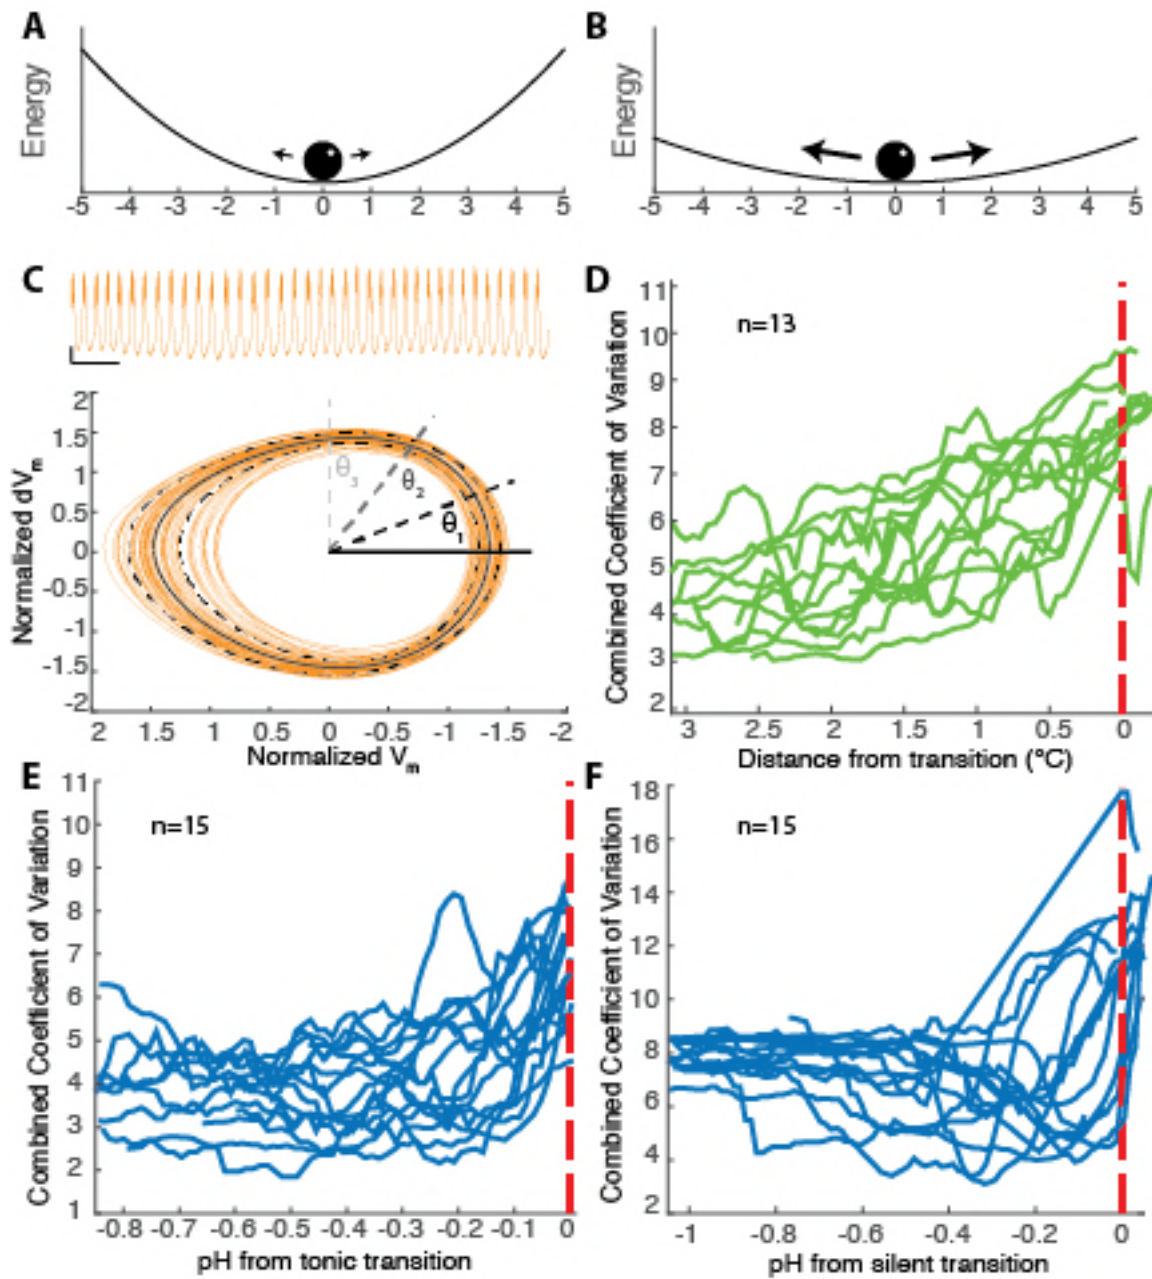

426

427

428 Figure 5

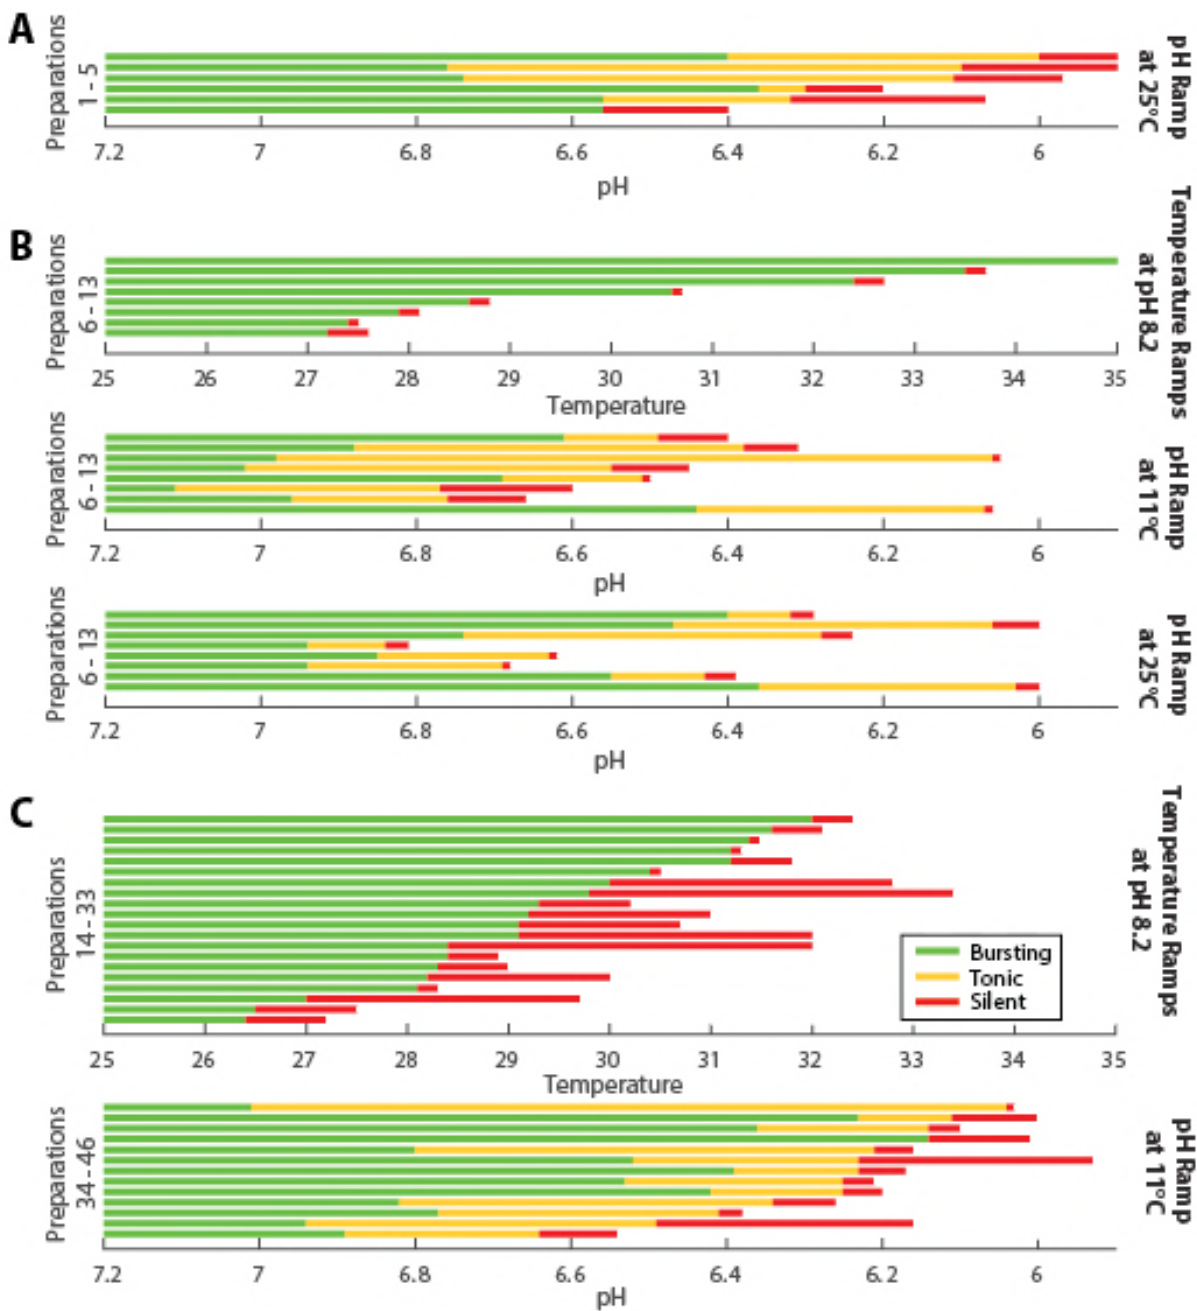

429

430

431

432

433

434 **Figure legends**

435

436 **Figure 1 – The pyloric and isolated pacemaker circuits**

437 (A) Above: Circuit diagram of the pyloric network of the stomatogastric ganglion. Chemical  
438 synapses are represented by curved lines with colored balls where red indicates a  
439 cholinergic synapse and blue is a glutamatergic synapse. Electrical synapses are represented  
440 by resistor symbols. Below: An intracellular recording of the PD neuron from the intact  
441 pyloric circuit. (B) Above: Circuit diagram of the isolated pacemaker after the addition of  
442 PTX. Below: An intracellular recording of the PD neuron from the isolated pacemaker circuit.  
443 (A, B) Scale: 10mV with dash at -50mV

444

445 **Figure 2 – Activity of isolated pacemaker near critical temperatures**

446 (A-C) Intracellular recordings of the PD neuron in the presence of PTX across a range of  
447 temperatures. Scale: 10mV with dash at -50mV (D-F) Burst frequency (D), duty cycle (E), and  
448 minimum voltage during oscillation (F) of PD neuron from 13 preparations plotted as a  
449 function of temperature. Duty cycle computed from intracellular traces as burst duration  
450 normalized to period of oscillation. Duty cycle becomes undefined for single spike bursts.  
451 Colored lines correspond to example experiments with same color in (A-C). (G-H) Above:  
452 average burst frequency (G) and duty cycle (H) across preparations plotted as a function of  
453 distance, in degrees Celsius, to transition to silence. Error bars represent standard  
454 deviations. Not all cells were recorded for 3 degrees before transition (see methods). Below:  
455 coefficients of variation for burst frequency and duty cycle, respectively, calculated from  
456 above plots.

457

458 **Figure 3 – Activity of isolated pacemaker in acidic pH**

459 (A-C) Intracellular recordings of the PD neuron in the presence of PTX across range of acidic  
460 pH. Scale: 10mV with dash at -50mV (D-F) Burst frequency (D), duty cycle (E), and minimum  
461 voltage during oscillation (F) of PD neuron plotted as a function of pH from 15 preparations.  
462 Duty cycle computed as in figure 2. Colored traces correspond to example experiments of  
463 same color in (A-C). Frequency and duty cycle are only plotted when cell is bursting. (G)  
464 Above: average burst frequency (G) and duty cycle (H) across preparations plotted as a  
465 function of distance to transition to tonic spiking. Error bars represent standard deviations.  
466 Not all cells were recorded for a range of 1 pH. Below: coefficients of variation for burst  
467 frequency and duty cycle, respectively, calculated from above plot.

468

469 **Figure 4 – Variance increases at the population level prior to transitions in activity pattern**

470 A, B) Cartoon schematic depicting noisy ball attracted to bottom of trough. The same  
471 amount of noise moves the ball more in (B) compared to (A). (C) Above: voltage trace from  
472 PD neuron in isolated pacemaker plotted in orange. Scale: 1 second, 5mV at -50mV. Below:  
473 Phase portrait generated from low passed voltage trace plotted in orange as normalized  
474 membrane voltage ( $V_m$ ) versus normalized instantaneous change in voltage ( $dV_m$ , see

475 methods). The solid black line represents the mean of the oscillations and the dashed black  
476 lines are two standard deviations plus and minus the mean. These values, means and  
477 standard deviations, are calculated for 200 points in phase schematized by the solid and  
478 dashed black and grey lines. (D) Each green line represents the moving average of combined  
479 coefficients of variation (see methods) plotted as a function of temperature from transition  
480 to silence (red line). (E-F) Each blue line represents the moving average of combined  
481 coefficient of variation as a function of pH. Experiments are aligned to transition. (E) Red  
482 line represents transition to tonic spiking. (F) Red line represents transition to silence.

483

#### 484 **Figure 5 – Stereotyped activity patterns across temperature and pH**

485 (A) Each horizontal line represents one preparation exposed to a range of pH at 25°C (n=5).  
486 The qualitative activity pattern, or state, is indicated with color, green corresponding to  
487 bursting, yellow to tonic spiking, and red to silence. (B) The same preparation was exposed  
488 to each condition and plotted in the same order across conditions (n=8). Meaning the first  
489 horizontal line the temperature condition corresponds to the first horizontal line in the pH  
490 conditions. (C) The top set of preparations were exposed to increasing temperature (n=20,  
491 13 from figure 2 and 7 additional without intracellular recordings) and the bottom set of  
492 preparations were exposed to decreasing pH (n=15) (A-C) Preparations are ordered based  
493 on transition to silence.

494

## 495 References

- 496 Caplan JS, Williams AH, Marder E. 2014. Many parameter sets in a multicompartiment model  
497 oscillator are robust to temperature perturbations. *The Journal of neuroscience : the*  
498 *official journal of the Society for Neuroscience* 34: 4963-75
- 499 Chisholm RA, Filotas E. 2009. Critical slowing down as an indicator of transitions in two-  
500 species models. *Journal of theoretical biology* 257: 142-49
- 501 Church J, Baxter KA, McLarnon JG. 1998. pH modulation of Ca<sup>2+</sup> responses and a Ca<sup>2+</sup>-  
502 dependent K<sup>+</sup> channel in cultured rat hippocampal neurones. *The Journal of*  
503 *physiology* 511: 119-32
- 504 Cook DL, Ikeuchi M, Fujimoto WY. 1984. Lowering of p<sub>H</sub>i inhibits Ca<sup>2+</sup>-activated K<sup>+</sup> channels  
505 in pancreatic B-cells. *Nature* 311: 269
- 506 Doering C, McRory J. 2007. Effects of extracellular pH on neuronal calcium channel  
507 activation. *Neuroscience* 146: 1032-43
- 508 Goaillard J-M, Taylor AL, Schulz DJ, Marder E. 2009. Functional consequences of animal-to-  
509 animal variation in circuit parameters. *Nature neuroscience* 12: 1424
- 510 Golowasch J, Deitmer J. 1993. pH regulation in the stomatogastric ganglion of the crab  
511 *Cancer pagurus*. *Journal of Comparative Physiology A* 172: 573-81
- 512 Grashow R, Brookings T, Marder E. 2010. Compensation for variable intrinsic neuronal  
513 excitability by circuit-synaptic interactions. *Journal of Neuroscience* 30: 9145-56
- 514 Haddad SA, Marder E. 2018. Circuit Robustness to Temperature Perturbation Is Altered by  
515 Neuromodulators. *Neuron* 100: 609-23 e3
- 516 Haley JA, Hampton D, Marder E. 2018. Two central pattern generators from the crab, *Cancer*  
517 *borealis*, respond robustly and differentially to extreme extracellular pH. *BIORXIV*  
518 2018/374405
- 519 Hille B. 2001. *Ion channels of excitable membranes*. Sinauer. xviii, 814 p., [8] p. of plates pp.
- 520 Hooper SL, Thuma JB, Guschlbauer C, Schmidt J, Buschges A. 2015. Cell dialysis by sharp  
521 electrodes can cause nonphysiological changes in neuron properties. *J Neurophysiol*  
522 114: 1255-71
- 523 Kandel D, Domany E, Ron D, Brandt A, Loh Jr E. 1988. Simulations without critical slowing  
524 down. *Physical review letters* 60: 1591
- 525 Marder E, Eisen JS. 1984. Transmitter identification of pyloric neurons: electrically coupled  
526 neurons use different neurotransmitters. *J. Neurophysiol.* 51: 1345-61
- 527 Marder E, Haddad SA, Goeritz ML, Rosenbaum P, Kispersky T. 2015. How can motor systems  
528 retain performance over a wide temperature range? Lessons from the crustacean  
529 stomatogastric nervous system. *Journal of Comparative Physiology A* 201: 851-56
- 530 O'Leary T, Marder E. 2016. Temperature-Robust Neural Function from Activity-Dependent  
531 Ion Channel Regulation. *Curr Biol* 26: 2935-41
- 532 O'Leary T, Williams AH, Caplan JS, Marder E. 2013. Correlations in ion channel expression  
533 emerge from homeostatic tuning rules. *Proceedings of the National Academy of*  
534 *Sciences of the United States of America* 110: E2645-54
- 535 O'Leary T, Williams AH, Franci A, Marder E. 2014. Cell types, network homeostasis, and  
536 pathological compensation from a biologically plausible ion channel expression  
537 model. *Neuron* 82: 809-21
- 538 Obara M, Szeliga M, Albrecht J. 2008. Regulation of pH in the mammalian central nervous  
539 system under normal and pathological conditions: facts and hypotheses.  
540 *Neurochemistry international* 52: 905-19
- 541 Pequeux A. 1995. Osmotic regulation in crustaceans. *Journal of Crustacean Biology* 15: 1-60

- 542 Rinberg A, Taylor AL, Marder E. 2013. The effects of temperature on the stability of a  
543 neuronal oscillator. *PLoS computational biology* 9: e1002857
- 544 Robertson RM, Money TG. 2012. Temperature and neuronal circuit function: compensation,  
545 tuning and tolerance. *Curr Opin Neurobiol* 22: 724-34
- 546 Roemschied FA, Eberhard MJ, Schleimer JH, Ronacher B, Schreiber S. 2014. Cell-intrinsic  
547 mechanisms of temperature compensation in a grasshopper sensory receptor  
548 neuron. *Elife* 3: e02078
- 549 Sartoris F-J, Pörtner H-O. 1997. Temperature dependence of ionic and acid-base regulation  
550 in boreal and arctic Crangon crangon and Pandalus borealis. *Journal of experimental  
551 marine biology and ecology* 211: 69-83
- 552 Scheffer M. 2010. Complex systems: foreseeing tipping points. *Nature* 467: 411
- 553 Scheffer M, Carpenter SR, Lenton TM, Bascompte J, Brock W, et al. 2012. Anticipating critical  
554 transitions. *science* 338: 344-48
- 555 Schulz DJ, Goaillard JM, Marder E. 2006. Variable channel expression in identified single and  
556 electrically coupled neurons in different animals. *Nat Neurosci* 9: 356 - 62
- 557 Schulz DJ, Goaillard JM, Marder EE. 2007. Quantitative expression profiling of identified  
558 neurons reveals cell-specific constraints on highly variable levels of gene expression.  
559 *Proceedings of the National Academy of Sciences of the United States of America*  
560 104: 13187-91
- 561 Soofi W, Goeritz ML, Kispersky TJ, Prinz AA, Marder E, Stein W. 2014. Phase maintenance in  
562 a rhythmic motor pattern during temperature changes *in vivo*. *J Neurophysiol* 111:  
563 2603-13
- 564 Tang L, Goeritz M, Caplan J, Taylor A, Fisek M, Marder E. 2010. Precise Temperature  
565 Compensation of Phase in a Rhythmic Motor Pattern. *PLoS Biol* 8: e1000469
- 566 Tang LS, Taylor AL, Rinberg A, Marder E. 2012. Robustness of a rhythmic circuit to short- and  
567 long-term temperature changes. *The Journal of neuroscience : the official journal of  
568 the Society for Neuroscience* 32: 10075-85
- 569 Taylor AL, Goaillard JM, Marder E. 2009. How multiple conductances determine  
570 electrophysiological properties in a multicompartement model. *The Journal of  
571 neuroscience : the official journal of the Society for Neuroscience* 29: 5573-86
- 572 Temporal S, Lett KM, Schulz DJ. 2014. Activity-dependent feedback regulates correlated ion  
573 channel mRNA levels in single identified motor neurons. *Curr Biol* 24: 1899-904
- 574 Tombaugh GC, Somjen GG. 1996. Effects of extracellular pH on voltage-gated Na<sup>+</sup>, K<sup>+</sup> and  
575 Ca<sup>2+</sup> currents in isolated rat CA1 neurons. *The Journal of physiology* 493: 719-32
- 576 Truchot J. 1973. Temperature and acid-base regulation in the shore crab *Carcinus maenas*  
577 (L.). *Respiration physiology* 17: 11-20
- 578 Veraart AJ, Faassen EJ, Dakos V, van Nes EH, Lürling M, Scheffer M. 2012. Recovery rates  
579 reflect distance to a tipping point in a living system. *Nature* 481: 357
- 580 Whiteley N. 2011. Physiological and ecological responses of crustaceans to ocean  
581 acidification. *Marine Ecology Progress Series* 430: 257-71
- 582 Xiong Z-Q, Stringer JL. 2000. Extracellular pH responses in CA1 and the dentate gyrus during  
583 electrical stimulation, seizure discharges, and spreading depression. *Journal of  
584 Neurophysiology* 83: 3519-24
- 585
